# Supplementary material for: Effect of Start-Up Strategies and Electrode Materials on Carbon Dioxide Reduction on Biocathodes
Source: PubMed Central journal article supplement (PMC5795077; doi:10.1128/aem.02242-17), 2018-01-31
Supplement: AEM.02242-17_zam004188331s1.pdf [file AEM.02242-17_zam004188331s1.pdf]

# Supplemental Material

## Effect of start-up strategies and electrode materials on carbon dioxide reduction on bio-cathodes

Soroush Saheb-Alam,<sup>a#</sup> Abhijeet Singh,<sup>b</sup> Malte Hermansson,<sup>c</sup> Frank Persson,<sup>a</sup> Anna Schnürer,<sup>b</sup> Britt-Marie Wilén,<sup>a</sup> Oskar Modin<sup>a</sup>

Chalmers University of Technology, Department of Architecture and Civil Engineering, Division of Water Environment Technology, Gothenburg, Sweden<sup>a</sup>; Swedish University of Agricultural Sciences, Department of Molecular Sciences, BioGas group, Unit of Microbiology, Uppsala, Sweden<sup>b</sup>; University of Gothenburg, Chemistry and Molecular Biology, Gothenburg, Sweden<sup>c</sup>

#Address correspondence to Soroush Saheb-Alam, soroush.sahebalam@chalmers.se.

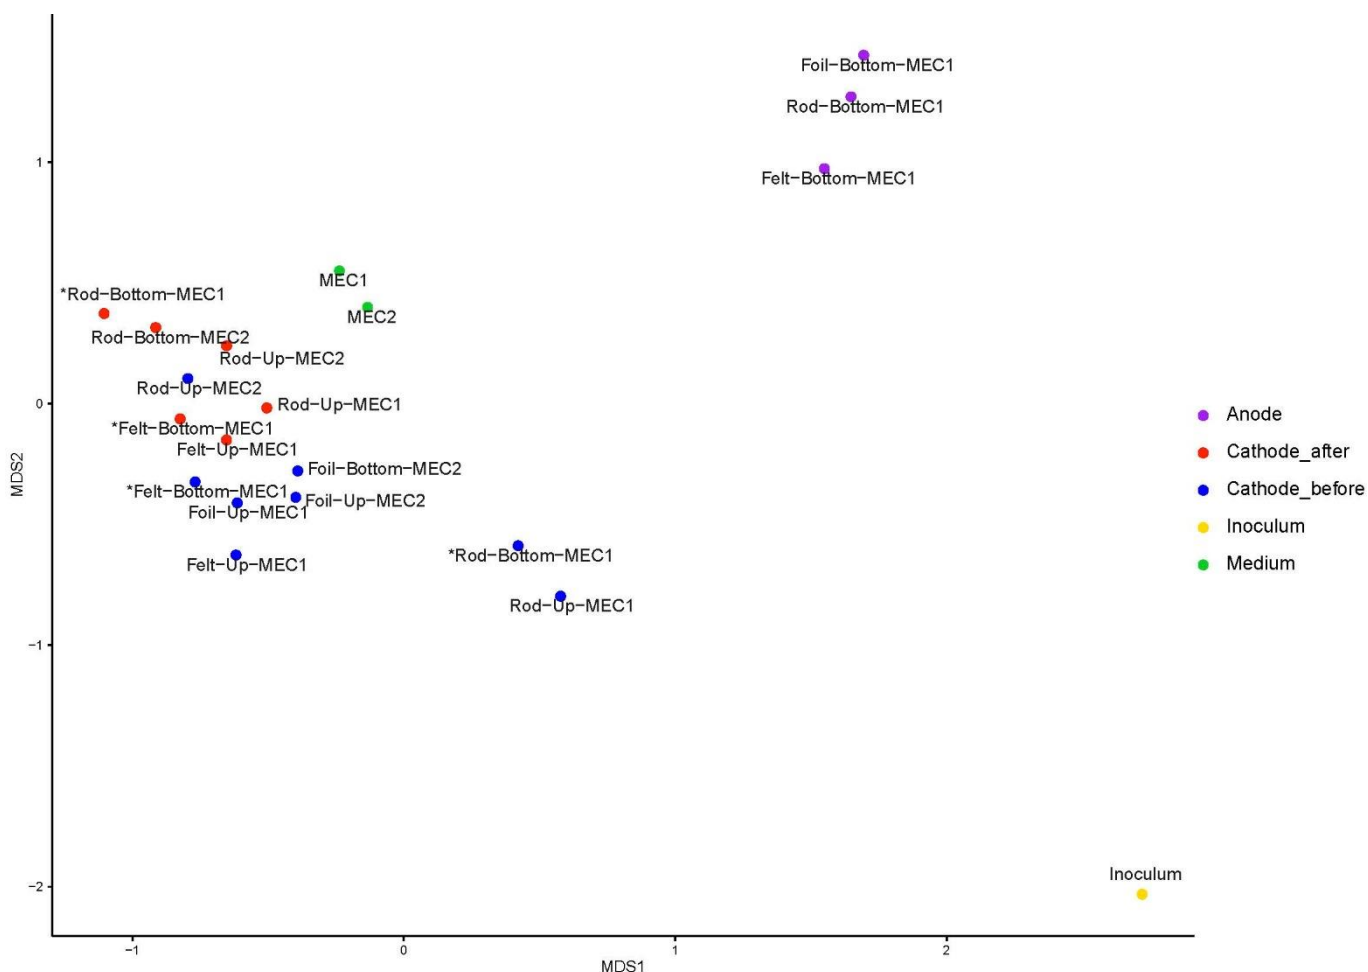

**Figure S1.** NMDS plot for microbial communities on different electrode materials before and after adding BES, medium and inoculum. \*Electrodes that were placed in MEC1 after removing bio-anodes.

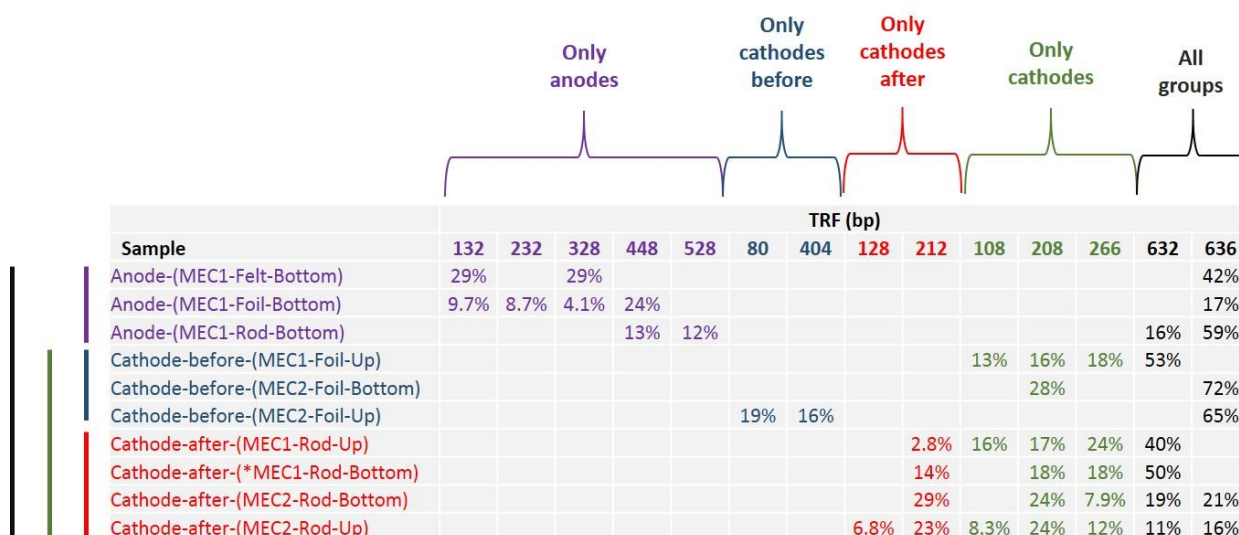

**Figure S2.** Table based on TRFLP data. The relative abundances of the different TRFs are shown. “Before” and “after” refer to before and after 2-bromoethanesulfonate addition. Asterisk (\*) means that the electrode was placed in MEC1 after removing some bio-anodes for sampling.

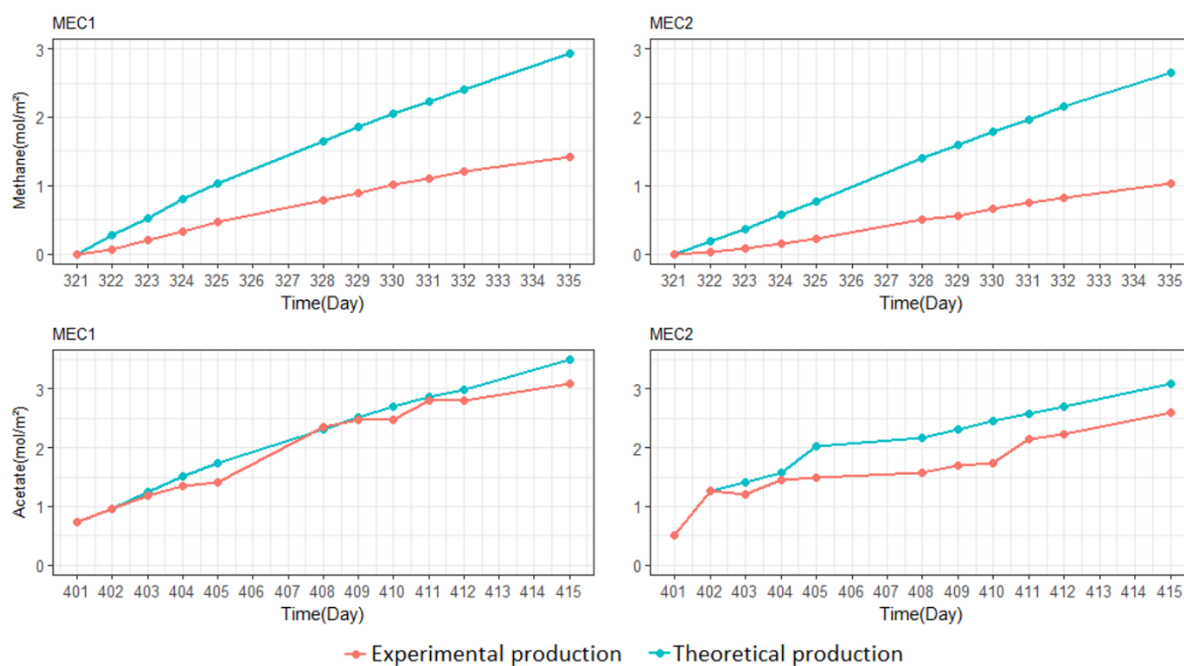

**Figure S3.** Methane and acetate production over two-week periods in MEC1 and MEC2. The theoretical production refers to the methane/acetate that should be produced from the current which flowed through the MEC. Experimental production refers to the methane/acetate that was measured in the experiment.
